# Supplementary material for: Results report of apatite fission-track analysis by LA-ICP-MS and its comparison with the conventional external detector method of dating
Source: Royal Society of Chemistry journal article supplement (doi:10.1039/d1ja00284h), 2022-01-01
Supplement: d1ja00284h1.csv [file d1ja00284h1.csv]

Sample	RhoD, x105 tr.cm-2	Zeta EDM, yr.cm2	Unc., yr.cm2	Zeta LAFT, Ma.um2	Unc., , Ma.um2
C020	7.592	330.41	20.16	432572	66093
C015	7.33	330.41	20.16	432770	67660
A192	12.3	353.53	21.6	363020	56933
C206	7.47	352.44	22.91	433699	67176
n	Sample	Grain/Mica	Tracks	Mica Count	Area, um2		UEDM, ppm	1s		ULA-ICP-MS, ppm	1s	ULA-ICP-MS, ppm	1s	ULA-ICP-MS, ppm	1s		Grain age EDM, Ma	1s	LAFT Age, Ma	1s
1	C020	Grain01	4	17	3747		8.9	0.75		10.53	0.28						29.4	16.4	22.2	17.4
2	C020	Grain02	2	11	1522		14.18	1.54		8.23	0.29						22.8	17.5	34.7	32.2
3	C020	Grain03	21	110	2460		87.73	5.32		80.07	2.45						23.9	5.7	23.3	15
4	C020	Grain04	3	28	2498		21.98	1.54		20.83	0.55						13.4	8.2	12.6	10.5
5	C020	Grain05	1	6	3124		3.77	0.67		4.39	0.14						20.9	22.5	15.9	18.6
6	C020	Grain06	2	14	1154		23.8	2.22		24.13	1.48						17.9	13.5	15.7	14.5
7	C020	Grain07	4	11	3187		6.77	0.74		7.97	0.27						45.4	26.5	34.3	26.9
8	C020	Grain08	1	8	2999		5.23	0.73		4.99	0.18						15.7	16.6	14.6	17.1
9	C020	Grain09	2	12	2938		8.01	0.82		10.72	0.32						20.9	15.9	13.9	12.9
10	C020	Grain10	11	85	3108		53.65	3.28		48.89	1.82						16.2	5.2	15.8	10.7
11	C020	Grain11	2	28	2802		19.6	1.37		19.1	0.56						9	6.6	8.2	7.6
12	C020	Grain12	1	8	1279		12.27	1.7		10.12	0.57						15.7	16.6	16.8	19.6
13	C020	Grain13	4	28	3430		16.02	1.12		10.3	0.34						17.9	9.6	24.7	19.4
14	C020	Grain14	2	11	3813		5.66	0.62		4.83	0.14						22.8	17.5	23.7	22.1
15	C020	Grain15	3	21	2435		16.92	1.3		14.01	0.5						17.9	11	19.2	16
16	C020	Grain16	3	40	2966		26.45	1.72		24.15	0.69						9.4	5.6	9.1	7.6
17	C020	Grain17	14	60	2973		39.59	2.47		49.52	1.22						29.2	8.7	20.8	13.7
18	C020	Grain18	22	109	2446		87.4	5.31		99.85	2.34	145.65	5.13				25.3	5.9	16.2	10.3
19	C020	Grain19	4	40	2987		26.27	1.71		23.33	0.56	59.72	10.84	9.49	0.39		12.5	6.6	12.3	9.6
20	C020	Grain20	0	9	3904		4.52	0.57		2.37	0.09						6.6	9.6	10	15.2
21	C020	Grain21	1	21	4876		8.45	0.65		6.33	0.17						6	6.1	7.1	8.3
22	C020	Grain22	3	12	2046		11.51	1.18		13.76	0.68						31.3	20.2	23.2	19.4
23	C020	Grain23	4	23	3059		14.75	1.09		21.67	0.72						21.8	11.8	13.2	10.3
24	C020	Grain24	1	16	2758		11.38	0.99		10.46	0.29						7.8	8.1	7.6	8.8
25	C020	Grain25	1	10	2216		8.85	1.03		6.11	0.2						12.5	13.1	16.1	18.8
26	C020	Grain26	10	85	3009		55.41	3.39		68.48	1.97						14.7	4.9	10.6	7.2
27	C020	Grain27	2	29	3439		16.54	1.14		17.98	0.59						8.6	6.3	7.1	6.6
28	C020	Grain28	1	14	2424		11.33	1.06		8.17	0.26						9	9.3	11	12.9
29	C020	Grain29	35	247	2682		180.63	10.86		220.57	5.32						17.7	3.2	12.9	8.1
30	C020	Grain30	4	18	2165		16.31	1.33		25.12	0.91						27.8	15.4	16	12.6
31	C020	Grain31	3	18	3434		10.28	0.84		9.74	0.36	14.69	0.55				20.9	13	15.9	13.3
32	C020	Grain32	2	14	3480		7.89	0.74		6.39	0.41	6.63	0.22				17.9	13.5	19.2	17.8
33	C020	Grain33	2	35	2352		29.18	1.94		22.72	0.66						7.2	5.2	8.2	7.6
34	C020	Grain34	5	48	2576		36.55	2.32		38.21	1.14						13.1	6.1	11.1	8.3
35	C020	Grain35	1	8	819		19.16	2.66		11.44	0.43						15.7	16.6	23.3	27.1
36	C020	Grain36	1	6	1798		6.54	1.16		7.9	0.33						20.9	22.5	15.4	18
37	C020	Grain37	14	64	2563		48.97	3.04		84.6	2.11						27.4	8.1	14.1	9.3
38	C015	Grain01	17	33	8119		8.32	0.56		11.99	0.09						62.1	18.5	37.7	9.1
39	C015	Grain02	5	9	7196		2.56	0.32		2.56	0.03						66.9	37.3	58.5	26.2
40	C015	Grain03	34	137	3694		75.9	4.59		83.52	0.6						30	5.7	23.8	4.1
41	C015	Grain04	7	30	1415		43.37	2.98		46.71	1.13						28.2	11.8	22.9	8.7
42	C015	Grain05	25	50	6808		15.03	0.95		11.87	0.1						60.3	14.8	66.6	13.3
43	C015	Grain06	22	42	5236		16.41	1.06		21.07	0.17						63.1	16.6	43	9.2
44	C015	Grain07	9	32	6528		10.03	0.68		12.86	0.11						34	12.8	23.2	7.7
45	C015	Grain08	5	9	7417		2.48	0.31		2.35	0.03						66.9	37.3	61.7	27.6
46	C015	Grain09	9	18	7583		4.86	0.4		6.2	0.05						60.3	24.6	41.3	13.8
47	C015	Grain10	21	30	6228		9.86	0.68		14	0.12						84.2	24	51.9	11.3
48	C015	Grain11	10	15	3492		8.79	0.79		5.45	0.05						80.2	32.8	112.8	35.7
49	C015	Grain12	2	4	1669		4.9	1.26		3.03	0.05						60.3	52.2	85.1	60.2
50	C015	Grain13	15	92	1837		102.47	6.25		106.62	0.98	28.07	1.02				19.7	5.5	16.6	4.3
51	C015	Grain14	8	33	3843		17.57	1.18		22.15	0.34						29.3	11.5	20.3	7.2
52	C015	Grain15	13	63	5965		21.61	1.34		29.11	0.2	7.68	0.18				24.9	7.6	16.2	4.5
53	C015	Grain16	5	30	4485		13.69	0.94		10.51	0.09						20.2	9.7	22.9	10.3
54	C015	Grain17	27	95	7029		27.66	1.68		50.38	0.65						34.3	7.5	16.5	3.2
55	C015	Grain18	11	107	4864		45.02	2.73		36.25	0.36						12.4	3.9	13.5	4.1
56	C015	Grain19	8	13	6095		4.36	0.43		3.57	0.03						74.1	33.3	79.1	28
57	C015	Grain20	2	9	2515		7.32	0.92		2.05	0.03						26.9	21	83.5	59
58	C015	Grain21	33	41	5591		15.01	0.97		11.53	0.08						96.7	22.6	109.8	19.1
59	C015	Grain22	22	93	6479		29.37	1.79		36.46	0.21						28.6	6.8	20.1	4.3
60	C015	Grain23	18	33	6675		10.12	0.68		9.78	0.09						65.7	19.3	59.4	14
61	C015	Grain24	1	3	1456		4.22	1.43		2.82	0.09						40.2	46.5	52.5	52.5
62	C015	Grain25	29	102	1542		135.37	8.23		208.56	2.42						34.3	7.2	19.5	3.6
63	C015	Grain26	4	9	3332		5.53	0.7		6.71	0.07						53.6	32.2	38.6	19.3
64	C015	Grain27	8	38	2578		30.17	1.98		32.86	0.39						25.4	9.9	20.4	7.2
65	C015	Grain28	19	80	2679		61.11	3.75		56.81	0.89						28.7	7.3	27	6.2
66	C015	Grain29	30	123	4113		61.2	3.71		49.33	0.3						29.5	6	31.9	5.8
67	C015	Grain30	12	42	7314		11.75	0.76		13.61	0.16						34.5	11.3	26	7.5
68	C015	Grain31	9	7	4548		3.15	0.49		3.86	0.04						153.8	77.5	110	36.7
69	C015	Grain33	14	36	1307		56.35	3.73		23.13	0.15						46.9	14.8	99.5	26.6
70	C015	Grain36	12	50	3414		29.97	1.9		27.07	0.18						29	9.3	28	8.1
71	C015	Grain37	6	18	1576		23.37	1.91		25.21	0.25						40.2	19	32.6	13.3
72	A192	Grain01	10	11	806		16.65	1.81		11.27	0.21						194.7	85.1	196.9	62.4
73	A192	Grain02	10	14	864		19.75	1.84		7.48	0.19						153.5	63.5	275	87.2
74	A192	Grain03	3	4	875		5.57	1.43		4.07	0.11						161	123	151.1	87.3
75	A192	Grain04	7	9	868		12.65	1.6		8.91	0.2						166.9	84.1	162.2	61.4
76	A192	Grain05	16	29	1342		26.35	1.82		12.22	0.2						118.9	37	174.7	43.8
77	A192	Grain06	15	15	1286		14.22	1.28		11.28	0.18						213.8	78.1	185	47.9
78	A192	Grain07	7	5	747		8.16	1.7		5.83	0.17						297	174	285.6	108.3
79	A192	Grain08	3	3	934		3.92	1.33		4.17	0.1						214	175	138.2	79.9
80	A192	Grain09	11	10	1199		10.17	1.19		10.58	0.2						235	103	155.6	47
81	A192	Grain10	20	12	1381		10.6	1.09		11.43	0.2						353	129	225.9	50.7
82	A192	Grain11	4	5	439		13.91	2.9		6.5	0.18						172	115	249.9	125.1
83	A192	Grain12	14	19	1221		18.98	1.51		12.66	0.24						158.2	55.7	162.3	43.5
84	A192	Grain13	8	21	1441		17.77	1.36		7.88	0.15						82.3	34.2	126.7	44.9
85	A192	Grain14	18	12	1494		9.8	1.01		7.83	0.14						318	119	273.3	64.6
86	A192	Grain15	18	22	1501		17.87	1.35		10.05	0.18						175.5	55.8	213	50.4
87	A192	Grain16	7	6	2381		3.07	0.54		4.67	0.08						249	138	113.3	42.9
88	A192	Grain17	19	14	1741		9.81	0.91		13.15	0.21						289	102	148.9	34.2
89	A192	Grain18	10	6	692		10.58	1.87		11.84	0.19						353	182	217.9	69
90	A192	Grain19	5	5	851		7.16	1.5		6.45	0.16						214	135	163.2	73.1
91	A192	Grain21	12	9	991		11.08	1.4		13.23	0.21						284	125	164.1	47.4
92	A192	Grain22	14	14	1121		15.23	1.42		10.15	0.16						213.8	80.8	219.6	58.8
93	A192	Grain23	5	5	1340		4.55	0.95		4.56	0.09						214	135	146.8	65.7
94	A192	Grain24	12	20	1432		17.03	1.33		8.98	0.15						129.2	47.2	167.2	48.3
95	A192	Grain25	37	30	2437		15.01	1.03		12.41	0.18						262.7	64.5	218.3	36
96	A192	Grain26	11	5	572		10.67	2.23		12.25	0.27						461	249	278.9	84.3
97	A192	Grain27	17	14	1603		10.65	0.99		10.06	0.24						258.7	93.4	188.6	46
98	A192	Grain28	10	8	1585		6.16	0.85		4.98	0.08						266	126	225.8	71.5
99	A192	Grain29	11	9	1189		9.23	1.17		5.91	0.12						260	117	278.2	84.1
100	A192	Grain30	5	13	932		17.01	1.66		6.99	0.13						83.1	43.7	137.8	61.7
101	A192	Grain32	9	13	1500		10.57	1.03		7.98	0.15						148.8	64.5	135.1	45.1
102	A192	Grain33	13	11	1727		7.77	0.85		8.56	0.16						252	103	157.8	43.8
103	A192	Grain34	12	11	983		13.64	1.49		9.3	0.17						232.9	97.2	233.8	67.6
104	A192	Grain37	11	17	1671		12.41	1.04		8.02	0.14						139.2	53.9	147.2	44.5
105	A192	Grain39	25	22	1820		14.74	1.11		9.75	0.21						242.5	70.9	250.8	50.5
106	C206	Grain01	5	5	1907		5.26	1.1		7.34	0.16						130.3	82.4	77	34.7
107	C206	Grain02	6	6	1842		6.54	1.16		6.63	0.11						130.3	75.2	105.6	43.5
108	C206	Grain03	6	10	2888		6.95	0.81		6.87	0.11						78.5	40.5	65.3	26.9
109	C206	Grain04	7	22	4485		9.85	0.74		7.18	0.13						41.7	18.1	47	17.9
110	C206	Grain05	1	1	2176		0.92	0.92		0.77	0.03						130	184	128.1	128.3
111	C206	Grain06	7	8	2980		5.39	0.75		5.67	0.1						114.2	59.1	89.2	34.1
112	C206	Grain07	5	5	5182		1.94	0.4		1.65	0.04						130.3	82.4	125.8	56.7
113	C206	Grain08	3	4	3580		2.24	0.58		1.72	0.04						98	74.8	104.6	60.7
114	C206	Grain09	6	3	5084		1.18	0.4		1.38	0.04						258	182	182.8	75.3
115	C206	Grain10	3	2	4778		0.84	0.42		1.7	0.04						194	178	79.8	46.3
116	C206	Grain11	6	4	4911		1.64	0.42		1.68	0.04						194	126	155.5	64.1
117	C206	Grain12	5	3	4557		1.32	0.45		1.63	0.04						216	158	144.7	65.2
118	C206	Grain13	5	3	1809		3.33	1.13		2.35	0.05						216	158	250.3	112.8
119	C206	Grain14	6	13	2505		10.42	1.02		8.04	0.12						60.5	29.8	64.3	26.5
120	C206	Grain15	5	5	3517		2.85	0.6		1.49	0.04						130.3	82.4	203.7	91.8
121	C206	Grain16	12	14	3041		9.24	0.86		8.77	0.13						111.9	44	96.8	28.4
122	C206	Grain17	4	10	4132		4.86	0.57		4.34	0.08						52.4	31	48.1	24.2
123	C206	Grain18	3	1	2167		0.75	0.75		1.73	0.05						383	443	139.1	80.7
124	C206	Grain19	5	3	3878		2.78	0.94		3.08	0.06						216	158	160.6	72.3
125	C206	Grain20	18	18	4494		9.32	0.76		10.29	0.18						130.3	43.4	97.1	23.5
126	C206	Grain21	3	2	3265		0.89	0.45		1	0.07	1.1	0.04				194	178	136.6	79.2
127	C206	Grain22	4	4	4189		2.46	0.63		2.54	0.06						130.3	92.1	103.9	52.2
128	C206	Grain23	6	4	3286		1.92	0.49		1.6	0.04						194	126	191.1	78.7
129	C206	Grain24	3	4	3623		2.44	0.63		1.28	0.04						98	74.8	153.4	88.9
130	C206	Grain25	19	16	1541		8.87	0.77		5.93	0.1						154.5	52.4	188.9	44.6
131	C206	Grain26	3	2	2660		2.61	1.31		3.91	0.07						194	178	107.1	62.1
132	C206	Grain27	18	8	2825		6.04	0.84		10.26	0.19						290	123	141.5	34.2
133	C206	Grain28	2	5	6401		3.55	0.74		3.32	0.07						52.4	43.9	46.1	32.7
134	C206	Grain29	2	10	3800		3.14	0.37		1.66	0.04						26.3	20.4	40.6	28.8
135	C206	Grain30	3	2	3161		1.06	0.53		2.1	0.05						194	178	80.9	46.9
136	C206	Grain31	1	3	3945		1.91	0.65		2.57	0.06						43.7	50.5	26.6	26.7
137	C206	Grain32	5	2	3758		2.03	1.02		3.39	0.09	3.22	0.18				321	269	164.1	73.9
138	C206	Grain33	15	21	3404		10.69	0.82		6.91	0.12						93.3	31.6	118.2	31.2
139	C206	Grain34	8	7	3400		3.74	0.58		5.91	0.1						148.7	77	77.7	27.8
140	C206	Grain35	2	1	4222		0.59	0.59		1.49	0.04						258	316	84.8	60.1
141	C206	Grain36	3	5	2235		2.95	0.62		1.86	0.05						78.5	57.3	102.3	59.3
142	C206	Grain37	4	14	2588		6.66	0.62		5.33	0.1						37.5	21.3	38.5	19.3
